# Supplementary material for: Health-Related Quality of Life among Women Breast Cancer Patients in Eastern China
Source: PubMed Central journal article supplement (PMC6051298; doi:10.1155/2018/1452635), 2018-07-03
Supplement: 1452635.f1.pdf [file 1452635.f1.pdf]

# Supplementary Materials

## *Quality of life scores by socio-demographic and clinical characteristics of the participants*

### **Abbreviations:**

SD, standard deviation;

GHS, global health status; PF, physical functioning; RF, role functioning; EF, emotional functioning; CF, cognitive functioning;

SF, social functioning; FA, fatigue; NV, nausea and vomiting; DI, diarrhoea; FI, financial difficulties; PA, pain; DY, dyspnoea;

SL, insomnia; AP, appetite loss; CO, constipation; BRBI, body image; BRSEF, sexual functioning; BRFU, future perspective;

BRSEE, sexual enjoyment; BRST, systemic therapy side effect; BRBS, breast symptoms; BRAS, arm symptoms; BRHL, upset by hair loss.

**Table S1 Quality of life scores (Mean ± SD) by Age, Residence (house locality), Marital status**

| EORTC<br>Items                         | Age       |           |           | P       | Residence<br>(house locality) |            | P      | Marital status |                    |           | P       |
|----------------------------------------|-----------|-----------|-----------|---------|-------------------------------|------------|--------|----------------|--------------------|-----------|---------|
|                                        | ≤45       | 45-54     | ≥55       |         | Urban                         | Rural      |        | Married        | Divorced/<br>Widow | Single    |         |
| <b>Panel A - QLQ-C30 Questionnaire</b> |           |           |           |         |                               |            |        |                |                    |           |         |
| GHS                                    | 58.0±14.5 | 53.5±14.0 | 48.5±14.1 | <0.001* | 53.8±14.3                     | 53.8±15.1  | 0.782  | 52.9±14.7      | 58.3±11.2          | 65.7±13.5 | <0.001* |
| <b>Functional scales</b>               |           |           |           |         |                               |            |        |                |                    |           |         |
| PF                                     | 75.0±15.6 | 74.5±17.9 | 77.4±18.3 | 0.052   | 77.4±16.4                     | 73.5±17.8  | 0.002* | 76.5±17.3      | 64.9±15.6          | 72.1±12.9 | <0.001* |
| RF                                     | 78.4±24.4 | 75.6±26.1 | 78.3±26.2 | 0.383   | 79.2±25.0                     | 75.5±26.0  | 0.053  | 78.3±25.9      | 64.7±18.8          | 77.8±21.7 | <0.001* |
| EF                                     | 75.0±18.4 | 73.0±20.2 | 74.9±20.7 | 0.444   | 76.3±19.1                     | 72.1±20.1  | 0.014* | 75.6±19.7      | 60.7±18.5          | 68.8±13.2 | <0.001* |
| CF                                     | 77.9±18.1 | 75.1±19.2 | 77.9±21.5 | 0.096   | 79.0±18.9                     | 74.7±19.8  | 0.004* | 77.9±19.4      | 62.3±18.0          | 79.6±12.5 | <0.001* |
| SF                                     | 71.1±22.9 | 70.3±24.4 | 67.8±27.1 | 0.067   | 72.9±23.5                     | 66.8±25.3  | 0.003* | 70.6±24.8      | 57.1±19.9          | 74.7±22.8 | <0.001* |
| <b>Symptom scales</b>                  |           |           |           |         |                               |            |        |                |                    |           |         |
| FA                                     | 33.4±16.5 | 35.6±18.4 | 32.6±19.5 | 0.166   | 33.4±18.1                     | 34.63±18.0 | 0.340  | 33.2±18.2      | 42.3±16.9          | 36.2±12.9 | <0.001* |
| NV                                     | 19.2±21.4 | 20.6±21.2 | 16.6±21.8 | 0.065   | 16.9±20.7                     | 21.13±22.1 | 0.014* | 17.3±20.6      | 41.3±22.2          | 18.5±18.1 | <0.001* |
| DI                                     | 11.5±18.3 | 11.9±20.6 | 6.9±16.7  | 0.007*  | 9.1±18.5                      | 11.82±19.2 | 0.028* | 8.6±17.3       | 31.7±25.4          | 13.6±16.7 | <0.001* |
| FI                                     | 33.5±27.9 | 34.2±28.7 | 36.8±29.7 | 0.529   | 31.3±28.0                     | 38.13±28.9 | 0.002* | 33.9±28.4      | 45.2±29.3          | 32.1±31.3 | 0.038*  |
| PA                                     | 25.5±18.9 | 31.3±18.6 | 30.0±22.1 | 0.005*  | 27.2±20.3                     | 30.60±19.2 | 0.009* | 28.5±20.2      | 35.7±16.7          | 24.7±15.6 | 0.006*  |

|                                         |           |           |           |         |           |            |         |           |           |           |         |
|-----------------------------------------|-----------|-----------|-----------|---------|-----------|------------|---------|-----------|-----------|-----------|---------|
| DY                                      | 18.9±22.3 | 18.6±24.0 | 13.0±19.0 | 0.024*  | 15.6±21.7 | 18.84±22.6 | 0.052   | 15.5±21.1 | 37.3±26.7 | 21.0±21.0 | <0.001* |
| SL                                      | 32.0±24.7 | 33.3±25.6 | 28.0±21.8 | 0.158   | 32.4±25.4 | 30.43±23.3 | 0.476   | 31.3±24.5 | 39.7±22.4 | 21.0±21.0 | 0.006*  |
| AP                                      | 24.1±26.1 | 26.2±26.2 | 21.1±22.8 | 0.221   | 22.4±25.5 | 25.75±25.1 | 0.056   | 22.9±25.0 | 43.6±24.9 | 16.0±19.3 | <0.001* |
| CO                                      | 24.7±26.1 | 26.5±26.6 | 21.9±26.2 | 0.185   | 23.4±25.8 | 25.86±26.9 | 0.271   | 23.4±25.7 | 45.2±30.2 | 17.3±19.3 | <0.001* |
| <b>Panel B - QLQ-BR23 Questionnaire</b> |           |           |           |         |           |            |         |           |           |           |         |
| <b>Functional scales</b>                |           |           |           |         |           |            |         |           |           |           |         |
| BRBI                                    | 66.4±23.1 | 65.8±21.5 | 61.8±31.0 | 0.917   | 65.8±25.5 | 64.0±24.4  | 0.223   | 65.5±25.7 | 55.4±18.9 | 67.6±13.5 | 0.001*  |
| BRSEF                                   | 85.0±17.0 | 89.2±16.2 | 94.1±12.2 | <0.001* | 88.5±16.3 | 89.5±15.5  | 0.482   | 90.2±15.2 | 74.4±17.5 | 86.4±16.0 | <0.001* |
| BRFU                                    | 51.5±30.1 | 53.1±29.9 | 49.2±34.9 | 0.546   | 54.1±30.9 | 48.7±31.7  | 0.039*  | 51.8±31.7 | 46.0±32.9 | 54.3±21.0 | 0.503   |
| BRSEE                                   | 84.5±22.0 | 87.7±20.3 | 94.4±12.5 | <0.001* | 87.8±20.7 | 88.8±18.4  | 0.808   | 89.9±18.1 | 66.7±26.1 | 88.9±18.5 | <0.001* |
| <b>Symptom scales</b>                   |           |           |           |         |           |            |         |           |           |           |         |
| BRST                                    | 24.8±16.9 | 24.4±16.7 | 25.0±17.2 | 0.932   | 22.7±17.5 | 26.7±16.0  | <0.001* | 23.9±16.8 | 36.3±13.3 | 22.2±15.7 | <0.001* |
| BRBS                                    | 17.6±19.1 | 17.8±20.5 | 15.4±19.8 | 0.359   | 15.2±19.1 | 19.1±20.3  | 0.015*  | 15.5±19.5 | 34.9±18.0 | 20.7±15.6 | <0.001* |
| BRAS                                    | 18.3±18.0 | 21.7±19.9 | 20.8±21.2 | 0.258   | 18.4±18.9 | 22.1±20.3  | 0.016*  | 19.5±19.8 | 33.1±15.6 | 15.2±13.5 | <0.001* |
| BRHL                                    | 33.8±27.9 | 37.9±30.0 | 45.7±32.4 | 0.002*  | 35.9±30.1 | 41.2±30.2  | 0.025*  | 38.3±31.0 | 44.7±25.4 | 34.6±21.6 | 0.175*  |

**Table S2 Quality of life scores (Mean ± SD) by Educational level, Medical security**

| EORTC Items                            | Educational level            |                  |                                         |                             | P       | Medical security                           |                         |                           |           | P       |
|----------------------------------------|------------------------------|------------------|-----------------------------------------|-----------------------------|---------|--------------------------------------------|-------------------------|---------------------------|-----------|---------|
|                                        | Illiteracy or primary school | Secondary school | High school/ Technical secondary school | University degree and above |         | New rural cooperative medical system(NCMS) | Urban workers insurance | Urban residents insurance | others    |         |
| <b>Panel A - QLQ-C30 Questionnaire</b> |                              |                  |                                         |                             |         |                                            |                         |                           |           |         |
| GHS                                    | 50.4±12.0                    | 52.3±14.4        | 52.3±15.4                               | 61.0±15.2                   | <0.001* | 53.7±15.1                                  | 52.8±13.7               | 60.9±12.9                 | 57.0±20.1 | 0.001*  |
| <b>Functional scales</b>               |                              |                  |                                         |                             |         |                                            |                         |                           |           |         |
| PF                                     | 78.0±15.6                    | 75.2±18.4        | 75.9±18.4                               | 72.0±16.8                   | 0.001*  | 74.7±16.6                                  | 77.6±17.0               | 71.5±14.9                 | 65.1±23.7 | <0.001* |
| RF                                     | 79.5±24.5                    | 78.0±25.7        | 77.5±26.1                               | 73.8±26.2                   | 0.158   | 77.5±25.5                                  | 78.5±25.5               | 71.3±23.3                 | 70.5±28.8 | 0.137   |
| EF                                     | 76.8±19.6                    | 74.1±19.1        | 74.8±21.0                               | 70.4±18.8                   | 0.013*  | 72.9±20.1                                  | 76.4±19.2               | 72.7±18.8                 | 65.1±19.9 | 0.012*  |
| CF                                     | 78.5±19.4                    | 76.7±18.0        | 78.2±20.9                               | 73.7±19.4                   | 0.047*  | 75.8±19.6                                  | 79.4±18.9               | 70.8±16.9                 | 67.3±22.8 | 0.001*  |
| SF                                     | 67.8±25.8                    | 68.5±23.3        | 72.7±25.2                               | 71.4±23.3                   | 0.247   | 68.2±25.6                                  | 72.7±24.0               | 62.5±19.4                 | 65.4±23.1 | 0.028*  |
| <b>Symptom scales</b>                  |                              |                  |                                         |                             |         |                                            |                         |                           |           |         |
| FA                                     | 31.7±17.3                    | 34.5±19.5        | 35.2±18.0                               | 35.6±17.8                   | 0.026*  | 34.4±17.6                                  | 33.2±17.5               | 35.1±21.5                 | 37.6±24.1 | 0.464   |
| NV                                     | 15.6±18.5                    | 19.8±22.4        | 20.4±23.5                               | 21.7±22.1                   | 0.088   | 19.1±21.8                                  | 17.3±20.2               | 22.9±24.6                 | 32.0±24.0 | 0.010*  |
| DI                                     | 6.3±13.1                     | 11.7±22.0        | 9.7±18.2                                | 15.4±21.8                   | <0.001* | 10.1±18.4                                  | 8.0±16.5                | 22.9±24.3                 | 24.4±24.1 | <0.001* |

|    |           |           |           |           |         |           |           |           |           |        |
|----|-----------|-----------|-----------|-----------|---------|-----------|-----------|-----------|-----------|--------|
| FI | 38.2±28.6 | 35.4±27.3 | 32.1±30.0 | 31.5±28.4 | 0.063   | 36.6±29.2 | 31.2±26.9 | 44.8±33.4 | 39.7±31.3 | 0.038* |
| PA | 28.2±19.6 | 27.7±20.4 | 29.5±19.7 | 30.2±19.9 | 0.675   | 29.5±19.1 | 27.3±19.8 | 29.7±20.2 | 37.8±25.6 | 0.083  |
| DY | 11.5±16.9 | 18.0±24.5 | 18.3±24.2 | 23.3±23.1 | <0.001* | 18.0±22.1 | 14.7±21.5 | 26.0±26.4 | 25.6±21.7 | 0.003* |
| SL | 29.0±22.5 | 34.6±23.4 | 31.3±25.1 | 32.0±26.8 | 0.256   | 29.1±23.6 | 32.3±24.7 | 35.4±26.7 | 39.7±25.0 | 0.108  |
| AP | 20.3±22.6 | 24.0±24.7 | 27.2±27.7 | 26.4±26.6 | 0.117   | 24.1±25.3 | 22.9±23.8 | 27.1±31.0 | 33.3±32.7 | 0.520  |
| CO | 23.5±25.2 | 25.8±27.8 | 22.6±25.9 | 26.8±27.0 | 0.541   | 23.6±26.4 | 23.7±25.2 | 32.3±32.2 | 35.9±28.2 | 0.071  |

**Panel B - QLQ-BR23 Questionnaire**

**Functional scales**

|       |           |           |           |           |         |             |             |             |             |         |
|-------|-----------|-----------|-----------|-----------|---------|-------------|-------------|-------------|-------------|---------|
| BRBI  | 67.6±26.9 | 66.4±23.2 | 63.2±27.2 | 61.5±21.1 | 0.006*  | 64.83±24.26 | 65.30±26.23 | 63.80±22.06 | 62.82±22.64 | 0.741   |
| BRSEF | 93.5±13.2 | 89.1±16.2 | 88.7±14.6 | 83.1±18.3 | <0.001* | 90.65±14.53 | 89.86±15.49 | 76.34±21.85 | 77.56±15.59 | <0.001* |
| BRFU  | 50.0±33.6 | 51.6±30.4 | 50.6±32.9 | 54.1±27.8 | 0.729   | 49.94±31.62 | 52.84±31.51 | 53.12±30.36 | 50.00±30.18 | 0.779   |
| BRSEE | 94.1±13.6 | 89.0±17.4 | 88.5±18.4 | 79.7±25.4 | <0.001* | 89.70±17.77 | 89.63±19.31 | 76.34±26.10 | 74.36±21.72 | <0.001* |

**Symptom scales**

|      |           |           |           |           |         |             |             |             |             |         |
|------|-----------|-----------|-----------|-----------|---------|-------------|-------------|-------------|-------------|---------|
| BRST | 23.9±15.3 | 24.0±15.2 | 24.5±18.1 | 26.6±19.0 | 0.701   | 25.33±16.25 | 23.24±17.27 | 26.04±15.25 | 33.15±18.14 | 0.014*  |
| BRBS | 12.0±17.3 | 17.6±20.7 | 16.1±18.6 | 24.4±21.2 | <0.001* | 17.55±19.68 | 15.10±19.56 | 23.44±18.86 | 27.24±21.15 | <0.001* |
| BRAS | 17.8±20.1 | 20.5±20.6 | 20.4±18.0 | 23.2±19.3 | 0.017*  | 20.87±19.73 | 18.23±18.95 | 27.43±20.54 | 26.92±22.26 | 0.013*  |
| BRHL | 40.2±31.5 | 37.4±29.3 | 39.6±32.6 | 36.4±27.2 | 0.850   | 40.74±30.04 | 36.61±30.69 | 31.18±29.73 | 46.15±26.79 | 0.048*  |

**Table S3 Quality of life scores(Mean ± SD) by Annual household income, Disease duration**

| EORTC Items                            | Annual household income (CYN) |             |              |           | P       | Disease duration, months |           |           |           | P       |
|----------------------------------------|-------------------------------|-------------|--------------|-----------|---------|--------------------------|-----------|-----------|-----------|---------|
|                                        | < 30000                       | 30000-80000 | 80000-150000 | >150000   |         | ≤12                      | 13-36     | 37-60     | ≥61       |         |
| <b>Panel A - QLQ-C30 Questionnaire</b> |                               |             |              |           |         |                          |           |           |           |         |
| GHS                                    | 49.2±16.2                     | 52.3±13.0   | 59.3±13.7    | 62.8±12.0 | <0.001* | 55.7±13.8                | 53.4±15.6 | 50.4±12.8 | 54.7±15.6 | 0.007*  |
| <b>Functional scales</b>               |                               |             |              |           |         |                          |           |           |           |         |
| PF                                     | 74.6±20.5                     | 78.8±14.5   | 72.6±16.7    | 66.2±16.9 | <0.001* | 74.4±17.0                | 77.6±16.2 | 77.9±16.1 | 71.0±19.6 | 0.009*  |
| RF                                     | 73.7±28.3                     | 81.4±23.9   | 75.5±26.1    | 71.9±15.5 | 0.002*  | 76.6±24.1                | 79.8±25.8 | 77.4±24.4 | 74.3±28.5 | 0.237   |
| EF                                     | 75.6±20.2                     | 76.4±19.2   | 70.5±19.6    | 67.2±18.6 | 0.001*  | 72.4±18.3                | 75.7±20.8 | 77.5±20.5 | 71.5±18.7 | 0.003*  |
| CF                                     | 77.0±22.0                     | 79.3±18.2   | 74.3±18.9    | 68.7±16.3 | 0.001*  | 76.4±17.9                | 78.8±19.2 | 78.9±20.4 | 72.3±21.1 | 0.013*  |
| SF                                     | 65.1±27.6                     | 72.0±24.2   | 72.7±22.8    | 63.5±14.9 | 0.025*  | 69.7±23.0                | 70.6±26.0 | 73.4±23.3 | 65.3±25.7 | 0.068   |
| <b>Symptom scales</b>                  |                               |             |              |           |         |                          |           |           |           |         |
| FA                                     | 35.7±21.5                     | 31.7±17.0   | 35.7±15.3    | 36.1±18.5 | 0.004*  | 34.3±16.2                | 32.2±19.2 | 32.3±18.3 | 38.5±18.2 | 0.004*  |
| NV                                     | 18.8±22.4                     | 16.2±19.8   | 22.3±22.6    | 26.6±21.5 | 0.006*  | 21.9±20.7                | 16.4±21.5 | 14.1±17.5 | 23.5±24.9 | 0.001*  |
| DI                                     | 6.2±13.5                      | 8.3±17.1    | 15.7±23.0    | 24.0±22.8 | <0.001* | 13.2±19.9                | 8.6±17.5  | 4.8±12.5  | 14.7±22.9 | <0.001* |
| FI                                     | 42.2±30.7                     | 32.2±27.6   | 30.3±27.7    | 37.5±25.0 | 0.001*  | 33.7±28.5                | 35.0±28.5 | 30.1±26.8 | 40.4±30.4 | 0.067   |
| PA                                     | 29.9±21.5                     | 27.3±19.8   | 29.7±18.5    | 31.8±17.6 | 0.269   | 28.5±18.3                | 27.4±20.6 | 27.8±20.2 | 33.2±20.5 | 0.073   |

|    |           |           |           |           |         |           |           |           |           |        |
|----|-----------|-----------|-----------|-----------|---------|-----------|-----------|-----------|-----------|--------|
| DY | 14.7±20.0 | 14.1±20.8 | 23.7±26.1 | 24.0±15.2 | <0.001* | 18.6±21.0 | 13.4±21.5 | 16.1±21.4 | 22.9±25.1 | 0.001* |
| SL | 29.6±24.7 | 30.1±23.2 | 34.6±25.6 | 35.4±25.3 | 0.180   | 35.1±23.9 | 26.1±23.3 | 32.4±27.0 | 33.6±22.9 | 0.001* |
| AP | 21.3±25.4 | 22.5±23.8 | 28.3±27.2 | 30.2±24.5 | 0.024*  | 27.9±26.3 | 19.5±24.0 | 21.1±24.1 | 28.7±25.4 | 0.001* |
| CO | 22.4±26.0 | 21.7±24.4 | 29.4±27.8 | 36.5±30.9 | 0.003*  | 28.2±26.8 | 23.2±24.9 | 20.5±25.8 | 25.1±28.0 | 0.056  |

**Panel B - QLQ-BR23 Questionnaire**

**Functional scales**

|       |           |           |           |           |         |           |           |           |           |         |
|-------|-----------|-----------|-----------|-----------|---------|-----------|-----------|-----------|-----------|---------|
| BRBI  | 61.8±29.0 | 68.3±24.7 | 64.0±21.2 | 57.3±18.3 | 0.001*  | 63.0±24.2 | 67.4±25.4 | 67.0±25.9 | 61.5±24.2 | 0.004*  |
| BRSEF | 93.5±12.6 | 91.3±14.6 | 84.6±17.4 | 68.7±13.9 | <0.001* | 85.4±17.6 | 92.0±14.4 | 92.0±13.6 | 86.7±16.3 | <0.001* |
| BRFU  | 45.7±34.9 | 53.0±31.6 | 55.1±26.6 | 50.0±29.3 | 0.094   | 50.3±29.6 | 55.2±31.8 | 50.0±32.9 | 48.3±31.9 | 0.235   |
| BRSEE | 93.4±13.8 | 92.1±15.7 | 82.3±23.0 | 61.5±25.5 | <0.001* | 83.8±22.8 | 91.2±16.9 | 92.3±15.5 | 86.7±20.3 | 0.001*  |

**Symptom scales**

|      |           |           |           |           |         |           |           |           |           |         |
|------|-----------|-----------|-----------|-----------|---------|-----------|-----------|-----------|-----------|---------|
| BRST | 26.8±17.4 | 22.4±15.2 | 24.6±18.4 | 33.5±15.7 | 0.001*  | 26.2±16.8 | 21.9±16.5 | 24.5±16.8 | 27.4±17.1 | 0.013*  |
| BRBS | 17.4±20.2 | 11.9±16.3 | 23.0±21.9 | 30.2±20.5 | <0.001* | 20.4±20.3 | 13.8±17.7 | 13.1±19.2 | 21.5±21.6 | <0.001* |
| BRAS | 23.7±22.3 | 16.0±17.3 | 22.4±19.3 | 26.7±19.1 | <0.001* | 20.5±18.4 | 18.3±19.8 | 19.5±20.2 | 23.9±20.5 | 0.064   |
| BRHL | 42.9±34.5 | 37.1±30.7 | 36.9±25.0 | 36.6±26.3 | 0.459   | 39.6±29.4 | 37.1±30.7 | 36.8±30.7 | 41.3±30.8 | 0.444   |

**Table S4 Quality of life scores (Mean ± SD) by Metastatic breast cancer state (State M), Menopausal status**

| EORTC Items                            | Metastatic breast cancer state (State M) |           | P      | Menopausal status |                | P       |
|----------------------------------------|------------------------------------------|-----------|--------|-------------------|----------------|---------|
|                                        | No                                       | Yes       |        | Post-menopausal   | Pre-menopausal |         |
| <b>Panel A - QLQ-C30 Questionnaire</b> |                                          |           |        |                   |                |         |
| GHS                                    | 55.0±14.7                                | 49.9±13.9 | 0.001* | 51.0±15.6         | 57.3±12.6      | <0.001* |
| <b>Functional scales</b>               |                                          |           |        |                   |                |         |
| PF                                     | 75.8±16.4                                | 74.5±19.9 | 0.958  | 75.7±18.6         | 75.2±15.4      | <0.001* |
| RF                                     | 78.8±24.6                                | 72.6±28.1 | 0.021* | 76.0±26.9         | 78.9±23.7      | 0.001*  |
| EF                                     | 74.6±19.1                                | 73.2±21.7 | 0.703  | 73.3±20.8         | 75.4±18.3      | 0.052   |
| CF                                     | 77.8±18.3                                | 74.0±22.9 | 0.186  | 75.8±20.8         | 78.2±17.7      | 0.012*  |
| SF                                     | 71.5±24.1                                | 64.5±25.6 | 0.006* | 69.3±26.1         | 70.7±22.7      | 0.118   |
| <b>Symptom scales</b>                  |                                          |           |        |                   |                |         |
| FA                                     | 33.3±17.2                                | 36.4±20.6 | 0.260  | 35.2±19.9         | 32.6±15.4      | 0.016*  |
| NV                                     | 18.6±20.8                                | 20.2±23.5 | 0.794  | 18.3±21.2         | 19.9±21.8      | <0.001* |
| DI                                     | 10.5±19.0                                | 10.2±18.7 | 0.920  | 8.6±18.1          | 12.6±19.6      | 0.001*  |
| FI                                     | 33.1±28.8                                | 39.7±27.9 | 0.006* | 36.4±29.7         | 32.5±27.3      | 0.545   |



|    |           |           |       |           |           |         |
|----|-----------|-----------|-------|-----------|-----------|---------|
| PA | 28.0±19.2 | 31.7±21.7 | 0.108 | 31.1±20.9 | 26.1±18.1 | 0.001*  |
| DY | 16.6±21.5 | 19.1±24.3 | 0.357 | 16.7±22.6 | 17.9±21.7 | <0.001* |
| SL | 30.7±24.0 | 33.8±25.5 | 0.231 | 31.0±24.5 | 31.9±24.3 | 0.225   |
| AP | 23.0±24.4 | 27.7±27.9 | 0.111 | 23.6±25.2 | 24.6±25.4 | 0.038*  |
| CO | 24.5±25.9 | 25.1±27.9 | 0.964 | 24.4±27.0 | 24.8±25.5 | 0.136   |

**Panel B - QLQ-BR23 Questionnaire**

**Functional scales**

|       |            |           |        |           |           |         |
|-------|------------|-----------|--------|-----------|-----------|---------|
| BRBI  | 65.3±23.9  | 63.8±28.2 | 0.996  | 62.7±26.7 | 67.6±22.5 | 0.090   |
| BRSEF | 88.5±16.4  | 90.4±14.1 | 0.379  | 92.1±14.1 | 85.2±17.2 | <0.001* |
| BRFU  | 53.0±30.7  | 46.3±33.3 | 0.040* | 49.6±32.5 | 53.8±29.8 | 0.902   |
| BRSEE | 88.1±19.80 | 89.1±18.9 | 0.627  | 91.0±18.3 | 85.1±20.6 | <0.001* |

**Symptom scales**

|      |           |           |        |           |           |         |
|------|-----------|-----------|--------|-----------|-----------|---------|
| BRST | 23.9±16.5 | 27.5±17.7 | 0.034* | 25.3±17.4 | 24.0±16.2 | 0.023*  |
| BRBS | 16.5±19.0 | 19.1±22.3 | 0.414  | 16.9±20.4 | 17.4±19.1 | <0.001* |
| BRAS | 18.9±18.7 | 24.6±21.9 | 0.017* | 21.5±20.6 | 18.7±18.3 | 0.001*  |
| BRHL | 36.8±29.4 | 44.4±32.5 | 0.023* | 42.6±31.6 | 33.6±27.9 | 0.450   |

---
